# Supplementary material for: Identification of Potential Citrate Metabolism Pathways in Carnobacterium maltaromaticum
Source: MDPI journal article supplement (doi:10.3390/microorganisms9102169), 2021-10-18
Supplement: s1 [file s1]

## Supplementary Materials

**Table S1.** Compilation of genes related to citrate metabolism in *Carnobacterium maltaromaticum* 3Ba-6-II.

| Gene product                                                          | Pathway Locus |      | Proposed Function                                                       |
|-----------------------------------------------------------------------|---------------|------|-------------------------------------------------------------------------|
| Hypothetical protein; transcriptional regulator, GntR family          | 1             | 3134 | Regulator                                                               |
| Hypothetical protein; CitG; triphosphoribisyl-dephospho-CoA synthases | 1             | 3135 | Associated with active citrate lyase complex, similar to CitG           |
| Hypothetical protein; CitT(CitX); an acyl carrier protein             | 1             | 3136 | Associated with active citrate lyase complex, similar to CitT           |
| Oxaloacetate decarboxylase beta chain/Methylmalonyl-CoA decarboxylase | 1             | 3137 | EC 4.1.1.3, now EC 7.2.4.2/(EC 4.1.1.41)                                |
| Hypothetical protein; biotin/lipoyl attachment domain                 | 1             | 3138 | Transmembrane function; associated with functionality of OAD beta chain |
| Hypothetical protein; transmembrane function                          | 1             | 3139 | Transmembrane function; associated with functionality of OAD beta chain |
| Oxaloacetate decarboxylase alpha chain                                | 1             | 3140 | EC 4.1.1.3                                                              |
| Citrate/H <sup>+</sup> symporter of CitMHS family                     | 1             | 3141 | Citrate-iron uptake permease                                            |
| Citrate lyase alpha chain                                             | 1             | 3142 | EC 4.1.3.6                                                              |
| Citrate lyase beta chain                                              | 1             | 3143 | EC 4.1.3.6                                                              |
| Citrate lyase gamma chain, acyl carrier protein                       | 1             | 3144 | EC 4.1.3.6                                                              |
| [Citrate [pro-3S]-lyase] ligase                                       | 1             | 3145 | EC 6.2.1.22                                                             |
| Aconitate hydratase                                                   | 2             | 2652 | EC 4.2.1.3                                                              |
| Isocitrate dehydrogenase                                              | 2             | 2651 | EC 1.1.1.42                                                             |
| Citrate synthase                                                      | 2             | 2650 | EC 2.3.3.1                                                              |
| Citrate synthase                                                      | 2             | 2339 | EC 2.3.3.1                                                              |
| Similar to citrate lyase beta subunit                                 | ?             | 403  | E.C. 4.1.3.6                                                            |
| L-malate or citrate/H <sup>+</sup> symporter CimH (TC 2.A.24.2.4)     | 2?            | 1548 | Transporter                                                             |
| NADP-dependent malic enzyme soluble oxaloacetate                      | 2?            | 1547 | EC 1.1.1.40                                                             |

**Table S2.** The citrate utilization of the two *Carnobacterium maltaromaticum* strains Cm 6-1 and ATCC 5586.

| Filename                 | MS-Omics ID | Customer ID   | Citric acid (mM) | Average concentration |
|--------------------------|-------------|---------------|------------------|-----------------------|
| 210916-1-016-CS27370.cdf | CS27370     | APT           | 22               | 22                    |
| 210916-1-031-CS27371.cdf | CS27371     | APT +         | 30               | 30                    |
| 210916-1-026-CS30445.cdf | CS30445     | ATCC 35586/+1 | 27               | 28.25                 |
| 210916-1-013-CS30446.cdf | CS30446     | ATCC 35586/+2 | 28               |                       |
| 210916-1-017-CS30447.cdf | CS30447     | ATCC 35586/+3 | 29               |                       |
| 210916-1-021-CS30448.cdf | CS30448     | ATCC 35586/+4 | 29               |                       |
| 210916-1-029-CS30449.cdf | CS30449     | ATCC 35586/-1 | 18               | 18.7                  |
| 210916-1-015-CS30450.cdf | CS30450     | ATCC 35586/-2 | 19               |                       |
| 210916-1-027-CS30451.cdf | CS30451     | ATCC 35586/-3 | 19               |                       |
| 210916-1-012-CS30452.cdf | CS30452     | ATCC 35586/-4 | 12               | Not included          |
| 210916-1-023-CS30453.cdf | CS30453     | Cm 6-1/+1     | 28               | 28.25                 |
| 210916-1-028-CS30454.cdf | CS30454     | Cm 6-1/+2     | 28               |                       |
| 210916-1-019-CS30455.cdf | CS30455     | Cm 6-1/+3     | 28               |                       |
| 210916-1-014-CS30456.cdf | CS30456     | Cm 6-1/+4     | 29               |                       |
| 210916-1-022-CS30457.cdf | CS30457     | Cm 6-1/-1     | 18               | 19.5                  |
| 210916-1-024-CS30458.cdf | CS30458     | Cm 6-1/-2     | 19               |                       |
| 210916-1-030-CS30459.cdf | CS30459     | Cm 6-1/-3     | 20               |                       |
| 210916-1-020-CS30460.cdf | CS30460     | Cm 6-1/-4     | 21               |                       |

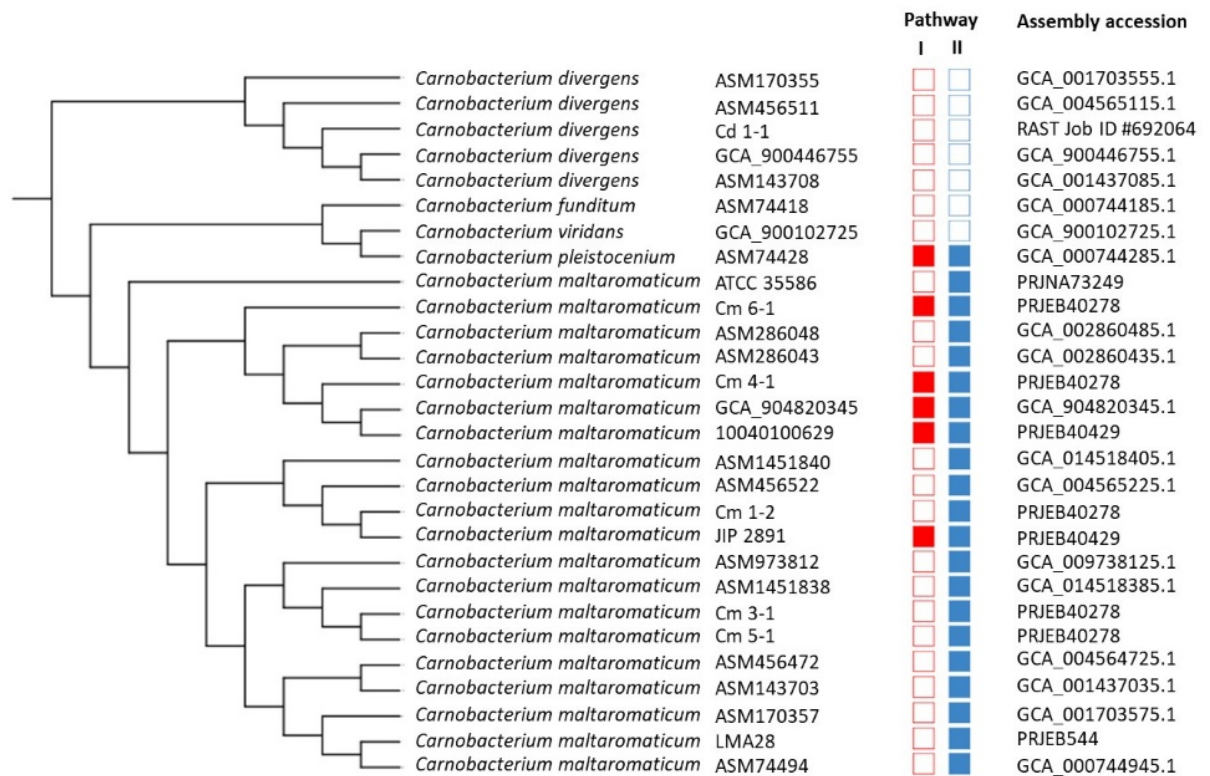

**Figure S1.** Comparison of SNP cladogram with the absence or presence of citrate pathway 1 and 2 genes in published genomes of *C. maltaromaticum* as well as other *Carnobacterium* spp. The filled squares indicate the confirmed presence while empty squares indicate the absence of pathway genes. The assembly accession includes IDs/numbers from NCBI bioproject, GenBank accession numbers, and RAST annotation server IDs.
